# Supplementary material for: Novel composite membranes of triazole modified graphene oxide and polybenzimidazole for high temperature polymer electrolyte membrane fuel cell applications
Source: Royal Society of Chemistry journal article supplement (doi:10.1039/c5ra16554g), 2015-01-01
Supplement: c5ra16554g1.pdf [file c5ra16554g1.pdf]

Supporting Information

**Novel composite membranes of triazole modified graphene oxide  
and polybenzimidazole for high temperature polymer electrolyte  
membrane fuel cell applications**

Jingshuai Yang, Chao Liu, Liping Gao, Jin Wang, Yixin Xu, Ronghuan He\*

Department of Chemistry, College of Sciences, Northeastern University, Shenyang  
110004, China.

Email: herh@mail.neu.edu.cn. Fax: +86-24-83676698; Tel.: +86-24-83683429.

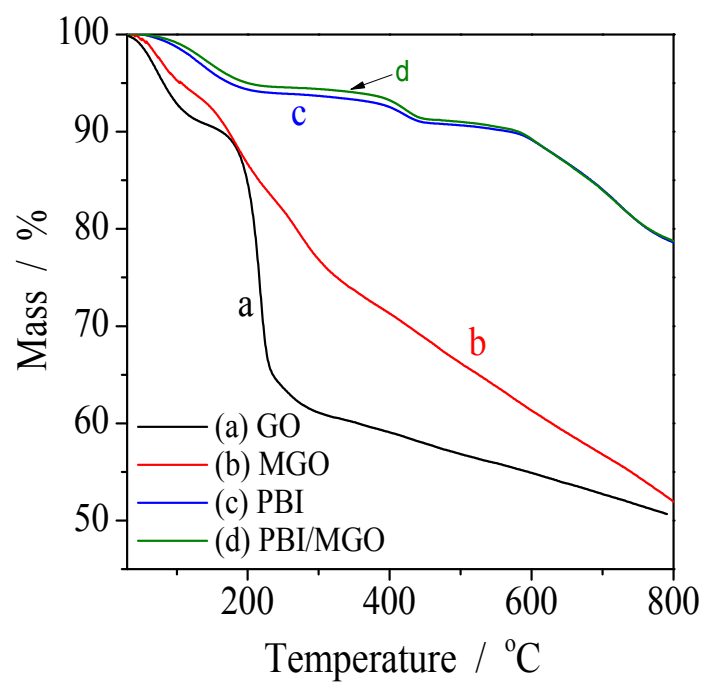

Fig. S1 TGA curves of GO and MGO in air, PBI and PBI/MGO membranes in  $N_2$  at a heating rate of  $10\text{ }^\circ\text{C min}^{-1}$

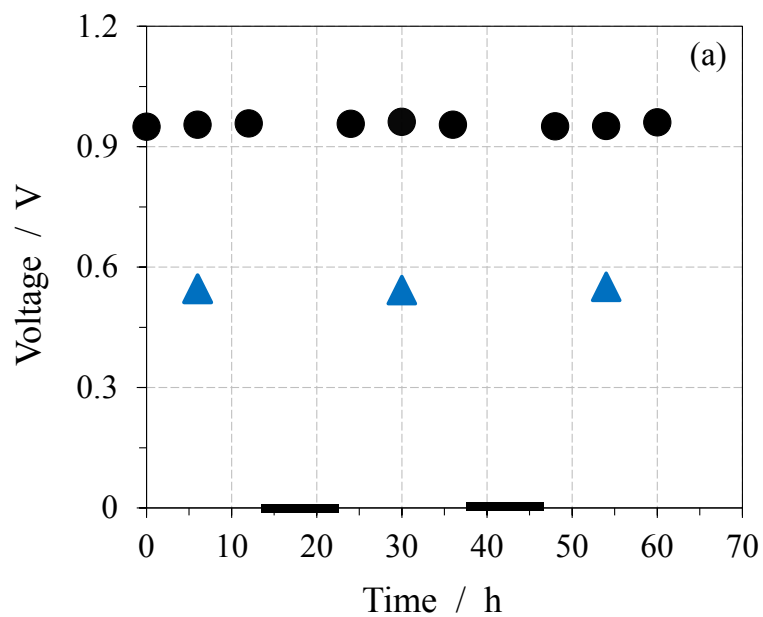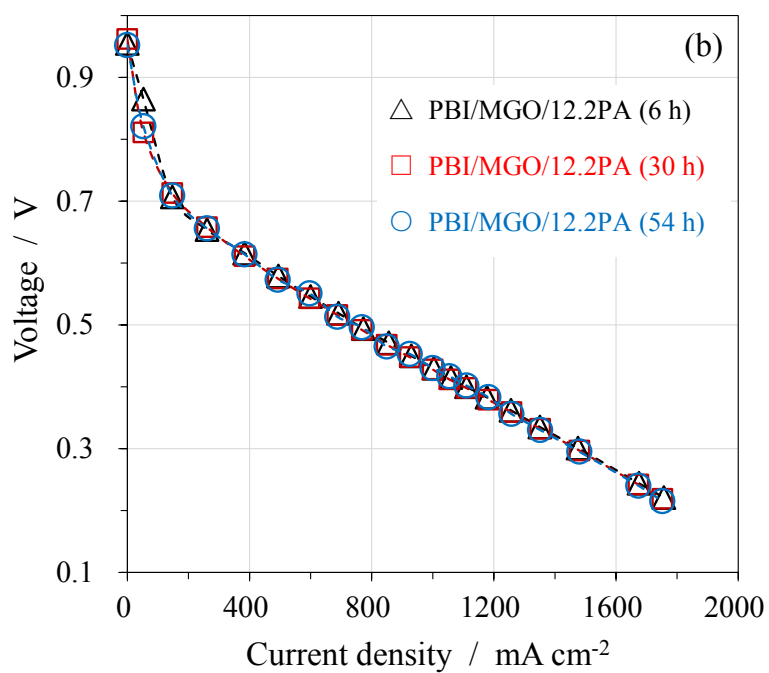

Fig. S2 Performance of the fuel cell feeding with anhydrous H<sub>2</sub> and O<sub>2</sub> under atmospheric pressure at 160 °C with a Pt loading of 0.6 mg cm<sup>-2</sup>. (a) OCVs (●) and cell voltages at a current load of 600 mA cm<sup>-2</sup> (▲) of the MEA based on the PBI/MGO/12.2PA membrane as a function of time; (b) Polarization curves of the MEA at operating time points of 6h, 30h, 54h, respectively.
